# Supplementary material for: Digging deeper: assessing soil quality in a diversity of conservation agriculture practices
Source: Copernicus journal article supplement (doi:10.5194/soil-12-79-2026), 2026-01-27
Supplement: Supplementary file 1 [file Supplement_S3_Table_S3.xlsx]

## Sheet: Sheet1
Supplement S3
Table S3 Raw values of soil properties
Field code	Placement	CA type	Region	Soil type	tmax	Wend	slope 30-60	dt 50-75	SOC	C:N	pH KCl	CEC	Base saturation	pH	Clay (<2µm)	Silt(2-50µm)	Sand (50-200µm)	POXC	SOC:Clay	POXC:SOC
					sec	[-]	sec-1	sec	%	[-]	[-]	cmolc kg-1	%	[-]				mg/kg	[-]	[-]
1	A	unclassified	Lo	AbB	250.92	0.99	5.2e-05	107.4	1.23511	9.24219	NA	NA	NA	7.94	15.7281	79.7913	4.48059	405.139	0.0785286	3.2802
1	B	unclassified	Lo	NA	NA	NA	NA	NA	NA	NA	NA	NA	NA	NA	NA	NA	NA	NA	NA	NA
1	C	unclassified	Lo	Aba1	19.32	0.74	-0.0017	122.04	0.963957	8.61004	7.04	9.49395	100	7.89	14.7378	80.6702	4.592	336.085	0.065407	3.48652
1	D	unclassified	Lo	AbB	4.69	0.91	-0.00084	133.99	1.039	8.9083	NA	NA	NA	7.97	14.9885	81.4758	3.53574	360.408	0.0693196	3.46882
1	E	unclassified	Lo	NA	15.57	0.76	-0.0011	120.35	NA	NA	NA	NA	NA	NA	NA	NA	NA	NA	NA	NA
1	F	unclassified	Lo	Aba1	3.84	0.85	-0.00044	92.11	1.06973	9.20451	6.89	16.1869	91.8684	8.01	14.9954	81.1289	3.87573	347.012	0.0713372	3.24393
2	A	CIN	SLo	Aba(b)1	10.03	0.004	-0.0019	431.04	1.00472	8.44552	6.31	12.1154	97.9899	7.51	11.7776	80.8731	7.34925	334.179	0.0853071	3.3261
2	B	CIN	SLo	NA	14.73	0.032	-0.0016	227.12	NA	NA	NA	NA	NA	NA	NA	NA	NA	NA	NA	NA
2	C	CIN	SLo	Aba(b)1	9.64	0.0021	-0.0024	120.15	0.932411	8.76546	NA	NA	NA	7.45	16.2037	76.0031	7.79321	329.289	0.0575431	3.53159
2	D	CIN	SLo	Aba(b)1	11.85	0.022	-0.0012	304.49	1.01292	8.19107	NA	NA	NA	7.53	13.7384	80.1404	6.1212	347.558	0.073729	3.43126
2	E	CIN	SLo	NA	15.78	0.018	-0.0026	142.46	NA	NA	NA	NA	NA	NA	NA	NA	NA	NA	NA	NA
2	F	CIN	SLo	Aba(b)1	9.77	0.0039	-0.0017	152.89	0.888545	8.52882	6.62	9.04873	100	7.7	10.9023	80.0752	9.02256	333.256	0.081501	3.75059
3	A	CIN	Lo	Aba1	23.41	0.69	-0.00057	262.75	0.910531	8.59486	5.76	10.6609	100	7.16	13.445	81.0541	5.50092	362.476	0.0677227	3.98093
3	B	CIN	Lo	NA	63.37	0.3	-0.00021	278.48	NA	NA	NA	NA	NA	NA	NA	NA	NA	NA	NA	NA
3	C	CIN	Lo	Aba1	57.17	0.82	-0.00047	109.2	1.01686	9.05402	NA	NA	NA	7.18	16.6254	77.7142	5.66038	424.372	0.0611627	4.17337
3	D	CIN	Lo	Aba1	172.86	0.81	-0.00025	65.61	1.13388	9.32114	6.14	10.87	88.6728	7.29	12.3667	78.8375	8.7958	443.18	0.0916881	3.90854
3	E	CIN	Lo	NA	56.14	0.58	-0.00038	87.61	NA	NA	NA	NA	NA	NA	NA	NA	NA	NA	NA	NA
3	F	CIN	Lo	Aba1	194.87	0.91	-3.1e-05	62	0.943881	8.69977	NA	NA	NA	7.44	16.3858	77.6373	5.9769	356.755	0.0576037	3.77966
5	A	Ig1	Lo	Ldc	80.04	0.76	-0.00042	76.41	1.26761	10.6979	NA	NA	NA	8.07	12.2945	45.72	41.9856	365.167	0.103104	2.88075
5	B	Ig1	Lo	NA	111.05	0.82	-0.00038	659.61	NA	NA	NA	NA	NA	NA	NA	NA	NA	NA	NA	NA
5	C	Ig1	Lo	Ldc	117.44	0.77	-0.00028	333.19	1.29782	9.57884	7.74	10.3949	100	8.23	12.0961	48.7748	39.1291	371.986	0.0963854	3.19057
5	D	Ig1	Lo	Ldc	NA	NA	NA	NA	1.4003	10.7795	NA	NA	NA	7.85	10.4538	60.3996	29.1467	476.553	0.133952	3.40322
5	E	Ig1	Lo	NA	293.81	0.85	-0.0014	131.17	NA	NA	NA	NA	NA	NA	NA	NA	NA	NA	NA	NA
5	F	Ig1	Lo	Ldc	260.23	0.93	2.2e-05	169.2	1.2167	9.68755	7.43	10.2124	100	8.09	11.5938	54.8771	33.5291	384.84	0.0944449	3.51461
6	A	Ig2	Con	A-Gbp1	57.17	0.77	-0.00035	196.6	1.11638	9.58847	NA	NA	NA	7.46	14.4396	81.1739	4.38651	445.088	0.0773139	3.98688
6	B	Ig2	Con	NA	NA	NA	NA	NA	NA	NA	NA	NA	NA	NA	NA	NA	NA	NA	NA	NA
6	C	Ig2	Con	A-Gbp1	42.35	0.83	-0.001	314.99	1.44568	10.0981	7.18	9.033	100	7.93	15.3779	79.8184	4.80375	441.528	0.0940102	3.05413
6	D	Ig2	Con	A-Gbp1	78.4	0.74	-0.00063	354.79	1.17686	9.0107	6.37	9.79459	100	7.57	15.1751	79.7665	5.05837	476.163	0.0775524	4.04603
6	E	Ig2	Con	NA	56.26	0.33	-0.0022	440.89	NA	NA	NA	NA	NA	NA	NA	NA	NA	NA	NA	NA
6	F	Ig2	Con	Aba1	43.68	0.74	-0.00031	240.88	1.20933	8.56198	NA	NA	NA	7.37	22.0964	74.0425	3.86106	455.447	0.0547298	3.7661
8	A	GEM	Fag	Aba0	51.35	0.94	0.00016	166.78	1.88271	9.37909	NA	NA	NA	7.35	20.3316	71.1605	8.50798	634.094	0.0926004	3.36798
8	B	GEM	Fag	NA	81.39	0.84	-0.00011	76.67	NA	NA	NA	NA	NA	NA	NA	NA	NA	NA	NA	NA
8	C	GEM	Fag	Aba0	15.9	0.86	-0.00047	225.35	1.41703	9.0547	5.79	12.3315	65.256	6.82	13.1722	75.9337	10.8942	469.592	0.107578	3.31391
8	D	GEM	Fag	kuAba2	26.35	0.87	-0.001	251.9	1.70126	8.99261	NA	NA	NA	7.09	16.2262	76.4951	7.27863	559.029	0.104847	3.28596
8	E	GEM	Fag	NA	14.61	0.95	-0.00013	221.81	NA	NA	NA	NA	NA	NA	NA	NA	NA	NA	NA	NA
8	F	GEM	Fag	Aba0	32.13	0.93	-0.00043	152.94	1.64565	8.98903	6.04	15.3942	68.4529	7.12	16.677	74.4648	8.85821	553.553	0.098678	3.36373
10	A	CIN	Con	Aba1	20.59	0.085	-0.0072	22.74	1.34216	10.442	7.23	11.3218	100	8.06	13.5198	75.7108	10.7695	335.349	0.0992735	2.49858
10	B	CIN	Con	NA	7.59	0.16	-0.0043	147.85	NA	NA	NA	NA	NA	NA	NA	NA	NA	NA	NA	NA
10	C	CIN	Con	Aba1	25.8	0.33	-0.0028	185.31	1.08953	8.82563	7.25	12.0881	100	8.18	17.15	74.0567	8.79326	342.888	0.0635292	3.14713
10	D	CIN	Con	Aba1	34.57	0.48	-0.0021	120.11	1.03516	8.8598	NA	NA	NA	8.09	16.3822	74.2914	9.32642	327.988	0.0631879	3.16848
10	E	CIN	Con	NA	47.32	0.057	-0.0017	43.79	NA	NA	NA	NA	NA	NA	NA	NA	NA	NA	NA	NA
10	F	CIN	Con	Aba1	33.73	0.13	-0.00048	402.12	1.0404	8.66209	NA	NA	NA	8.21	16.9858	74.1198	8.89438	344.864	0.0612513	3.31472
11	A	CIN	Con	(x)Aba	27.52	0.41	-0.0015	98.69	2.38165	13.4002	NA	NA	NA	8.07	22.8434	66.5944	10.5622	522.793	0.10426	2.19509
11	B	CIN	Con	NA	30.66	0.71	-0.00048	98.38	NA	NA	NA	NA	NA	NA	NA	NA	NA	NA	NA	NA
11	C	CIN	Con	Aba1	21.7	0.68	-0.0007	262.88	1.45095	8.53209	7.18	19.3411	85.6326	8.1	21.8775	59.2681	18.8544	503.785	0.0663214	3.47212
11	D	CIN	Con	Aba1	4.81	0.63	-0.003	138.52	1.29786	9.20255	NA	NA	NA	8.19	18.5129	73.2961	8.19102	477.69	0.0701055	3.6806
11	E	CIN	Con	NA	25.34	0.65	-0.0022	302.7	NA	NA	NA	NA	NA	NA	NA	NA	NA	NA	NA	NA
11	F	CIN	Con	Aba1	22.71	0.69	-0.00048	247.26	1.39675	8.89892	7.46	15.644	100	8.23	18.1803	70.2973	11.5223	489.974	0.0740067	3.64166
13	A	CIN	Lo	Aba1	170.4	0.89	-0.00027	123.47	1.11324	9.84443	6.35	7.45148	100	7.37	9.16189	86.0421	4.79605	397.001	0.121508	3.56617
13	B	CIN	Lo	NA	80.16	0.9	-0.00074	153.32	NA	NA	NA	NA	NA	NA	NA	NA	NA	NA	NA	NA
13	C	CIN	Lo	Aba0	8.59	0.39	-0.0029	137.98	1.18897	8.85475	NA	NA	NA	6.93	18.11	76.465	5.425	374.317	0.0656528	3.14824
13	D	CIN	Lo	Aba0	38.92	0.76	-0.00055	229.99	1.20636	10.4113	NA	NA	NA	6.97	11.5648	82.9478	5.48732	392.526	0.104313	3.2538
13	E	CIN	Lo	NA	93.15	0.75	-0.00066	390.37	NA	NA	NA	NA	NA	NA	NA	NA	NA	NA	NA	NA
13	F	CIN	Lo	Aba1	NA	NA	NA	NA	1.29733	10.2431	6.41	8.09898	100	7.28	12.0231	83.36	4.61686	406.708	0.107903	3.13497
19	A	GEM	Her	Gbbfi2	0.92	0.92	-0.00039	181.17	2.85731	8.97263	5.6	15.3834	56.6265	6.69	8.79397	71.1893	20.0168	583.833	0.324917	2.04329
19	B	GEM	Her	NA	22.22	0.92	-0.00035	82.12	NA	NA	NA	NA	NA	NA	NA	NA	NA	NA	NA	NA
19	C	GEM	Her	fGbb2	6.66	0.84	-0.00098	110.24	3.21244	9.35535	NA	NA	NA	6.5	11.9636	66.5975	21.4388	639.16	0.268517	1.98964
19	D	GEM	Her	Gbb0_1	15.31	0.91	-0.001	133.31	3.03594	9.26961	NA	NA	NA	6.39	9.10963	71.6888	19.2015	634.047	0.333267	2.08847
19	E	GEM	Her	NA	10.71	0.85	-0.00064	64.71	NA	NA	NA	NA	NA	NA	NA	NA	NA	NA	NA	NA
19	F	GEM	Her	Gbbfi2	166.45	0.98	-1.5e-05	0	2.80614	9.06762	5.88	14.8136	68.7064	6.78	12.34	69.4123	18.2477	618.836	0.224116	2.23763
20	A	Ig1	Her	Gbb0_1	394.87	0.97	-1e-05	10.96	2.08369	9.21645	NA	NA	NA	6.6	25.4412	51.28	23.2787	500.913	0.0819019	2.40398
20	B	Ig1	Her	NA	91.83	0.94	-9.6e-05	76.51	NA	NA	NA	NA	NA	NA	NA	NA	NA	NA	NA	NA
20	C	Ig1	Her	Gbb0_1	481.7	0.97	-1.6e-05	247.43	2.30094	9.3229	NA	NA	NA	6.42	20.9911	59.269	19.7399	537.905	0.109615	2.33776
20	D	Ig1	Her	Gbb0_1	76.64	0.96	-0.00033	123.32	3.10977	10.9964	5.12	17.5945	62.1704	6.29	21.7178	55.3188	22.9634	567.896	0.14319	1.82617
20	E	Ig1	Her	NA	55.41	0.81	-0.0015	494.59	NA	NA	NA	NA	NA	NA	NA	NA	NA	NA	NA	NA
20	F	Ig1	Her	Gbb0_1	447.58	0.98	-9.2e-06	247.58	2.1334	9.72725	5.46	14.1853	75.3564	6.61	15.0672	52.5421	32.3907	562.321	0.141592	2.6358
21	A	Ig2	Jur	j-wLba2	456.56	1	-8.3e-06	0	1.23296	8.56806	NA	NA	NA	6.7	13.5093	22.7729	63.7178	380.976	0.0912675	3.08992
21	B	Ig2	Jur	NA	1123.92	1	NA	NA	NA	NA	NA	NA	NA	NA	NA	NA	NA	NA	NA	NA
21	C	Ig2	Jur	j-wLba2	NA	NA	NA	NA	1.26562	8.43673	5.19	10.3487	70.5011	6.62	17.8111	28.0431	54.1458	367.272	0.0710576	2.90192
21	D	Ig2	Jur	j-wLba2	272.76	1	-4e-06	0	1.34943	8.38534	4.99	11.5432	74.0954	6.42	19.7068	25.6188	54.6744	366.8	0.0684755	2.71818
21	E	Ig2	Jur	NA	512.82	1	NA	0	NA	NA	NA	NA	NA	NA	NA	NA	NA	NA	NA	NA
21	F	Ig2	Jur	j-wLba2	170.51	1	-3.2e-05	0	1.3394	8.74351	NA	NA	NA	6.75	16.0328	22.7442	61.223	368.771	0.0835415	2.75325
22	A	CIN	Lo	Aba1	6.36	0.1	-0.0014	417.21	0.969021	8.66396	6.53	11.5728	100	7.41	27.5735	68.3344	4.09207	315.63	0.0351431	3.25721
22	B	CIN	Lo	NA	8.63	0.64	-0.0017	112.66	NA	NA	NA	NA	NA	NA	NA	NA	NA	NA	NA	NA
22	C	CIN	Lo	Aba1	17.38	0.41	-0.002	120.88	1.13001	8.89289	6.71	12.3931	100	7.45	17.0834	78.8166	4.10002	439.207	0.0661468	3.88675
22	D	CIN	Lo	Aba1	76.68	0.95	-0.00049	277.93	0.98671	8.97967	NA	NA	NA	7.61	16.3613	79.2612	4.37754	330.454	0.0603077	3.34904
22	E	CIN	Lo	NA	9.62	0.6	-0.0014	273.38	NA	NA	NA	NA	NA	NA	NA	NA	NA	NA	NA	NA
22	F	CIN	Lo	Abp( c )	17.27	0.77	-0.0013	455.36	1.019	8.79013	NA	NA	NA	7.46	9.34091	86.6836	3.97549	385.939	0.10909	3.78742
23	A	GEM	Con	ADa1	NA	NA	NA	NA	1.18779	9.27245	NA	NA	NA	7.13	22.8256	69.678	7.4964	430.434	0.0520377	3.62382
23	B	GEM	Con	NA	525.15	0.98	NA	92.94	NA	NA	NA	NA	NA	NA	NA	NA	NA	NA	NA	NA
23	C	GEM	Con	NA	1128.84	1	NA	NA	NA	NA	NA	NA	NA	NA	NA	NA	NA	NA	NA	NA
23	D	GEM	Con	NA	206.44	0.99	-9.2e-06	119.72	NA	NA	NA	NA	NA	NA	NA	NA	NA	NA	NA	NA
23	E	GEM	Con	NA	NA	NA	NA	NA	NA	NA	NA	NA	NA	NA	NA	NA	NA	NA	NA	NA
23	F	GEM	Con	NA	693.6	1	NA	0	NA	NA	NA	NA	NA	NA	NA	NA	NA	NA	NA	NA
24	A	CIN	Jur	NA	9.44	0.12	-0.0033	216.62	NA	NA	NA	NA	NA	NA	NA	NA	NA	NA	NA	NA
24	B	CIN	Jur	NA	10.59	0.44	-0.0014	306.19	NA	NA	NA	NA	NA	NA	NA	NA	NA	NA	NA	NA
24	C	CIN	Jur	NA	20.64	0.75	-0.00082	348.85	NA	NA	NA	NA	NA	NA	NA	NA	NA	NA	NA	NA
24	D	CIN	Jur	NA	NA	NA	NA	NA	NA	NA	NA	NA	NA	NA	NA	NA	NA	NA	NA	NA
24	E	CIN	Jur	NA	18.87	0.4	-0.0018	197.42	NA	NA	NA	NA	NA	NA	NA	NA	NA	NA	NA	NA
24	F	CIN	Jur	NA	9.27	0.32	-0.0058	83.88	NA	NA	NA	NA	NA	NA	NA	NA	NA	NA	NA	NA
25	A	unclassified	Lo	Aba1	NA	NA	NA	NA	1.34591	10.0168	NA	NA	NA	7.09	19.6572	66.0481	14.2947	477.129	0.0684694	3.54502
25	B	unclassified	Lo	NA	23.57	0.63	-0.00071	93.67	NA	NA	NA	NA	NA	NA	NA	NA	NA	NA	NA	NA
25	C	unclassified	Lo	Aba1	NA	NA	NA	NA	1.24824	9.05959	6.13	10.9677	99.7174	7.07	13.2893	74.0979	12.6128	493.305	0.0939285	3.95199
25	D	unclassified	Lo	Aba1	44.38	0.93	-0.00032	87.87	1.41757	8.89813	NA	NA	NA	6.9	19.9312	66.8282	13.2406	497.251	0.0711232	3.50777
25	E	unclassified	Lo	NA	17.27	0.9	-0.0002	230.11	NA	NA	NA	NA	NA	NA	NA	NA	NA	NA	NA	NA
25	F	unclassified	Lo	Aba1	18.15	0.74	-0.00072	153.32	1.17618	9.19422	5.84	12.473	86.1894	6.85	16.1365	69.9247	13.9388	447.424	0.0728893	3.80406
26	A	unclassified	Lo	Aca0	65.96	0.56	-0.00028	202.35	1.52727	8.58232	7.47	18.5176	100	8.06	19.0898	60.7056	20.2046	537.018	0.075674	3.71741
26	B	unclassified	Lo	NA	28.68	0.057	-0.0011	280.9	NA	NA	NA	NA	NA	NA	NA	NA	NA	NA	NA	NA
26	C	unclassified	Lo	Aca0	9.55	0.065	-0.0072	56.52	1.17389	9.21792	NA	NA	NA	7.13	14.4907	56.8758	28.6335	400.328	0.0810101	3.41027
26	D	unclassified	Lo	Aca0	87.72	0.5	-0.00014	247.53	1.17383	8.50533	6.4	15.1099	97.8693	7.26	17.369	61.5466	21.0844	404.733	0.0675819	3.44797
26	E	unclassified	Lo	NA	NA	NA	NA	NA	NA	NA	NA	NA	NA	NA	NA	NA	NA	NA	NA	NA
26	F	unclassified	Lo	Aca0	79.94	0.92	0.0001	318.37	1.52913	8.52124	NA	NA	NA	8.15	29.1679	48.7412	22.0909	498.677	0.0477686	3.57908
28	A	CIN	Lo	OE	44.05	0.28	-0.00018	154.62	1.35425	9.69574	NA	NA	NA	7.84	15.1976	72.3884	12.414	478.647	0.0891094	3.53442
28	B	CIN	Lo	NA	17.07	0.24	-0.0045	81.6	NA	NA	NA	NA	NA	NA	NA	NA	NA	NA	NA	NA
28	C	CIN	Lo	Aba(b)1	305.34	0.81	-0.00019	92.87	1.50884	11.2715	6.54	12.7385	98.408	7.48	19.9699	73.474	6.55614	472.591	0.0755557	3.13215
28	D	CIN	Lo	Aba(b)1	103.3	0.7	-0.00021	109.17	1.60262	11.2837	6.37	12.1082	100	7.31	20.6902	74.1724	5.13741	432.274	0.077458	2.69729
28	E	CIN	Lo	NA	125.43	0.73	-6.5e-05	169.43	NA	NA	NA	NA	NA	NA	NA	NA	NA	NA	NA	NA
28	F	CIN	Lo	Aba(b)1	90.35	0.72	-0.00011	153.79	1.31329	9.33548	NA	NA	NA	7.65	16.1876	78.5692	5.24321	444.585	0.0811291	3.38529
30	A	unclassified	Con	ADa0	196.52	0.91	-3e-05	340.23	2.31584	11.1099	6.34	12.7929	100	7.31	18.4981	72.0246	9.47733	549.526	0.125194	2.3729
30	B	unclassified	Con	NA	282.68	0.96	-0.00011	21.75	NA	NA	NA	NA	NA	NA	NA	NA	NA	NA	NA	NA
30	C	unclassified	Con	Afp	87.19	0.83	-1e-05	87.53	2.79996	13.5279	NA	NA	NA	7	17.4742	73.8681	8.65767	537.018	0.160234	1.91795
30	D	unclassified	Con	ADa0	273.52	0.96	-4.8e-06	154.75	1.35091	9.51657	6.86	10.3832	100	7.7	17.8855	76.3116	5.80286	405.094	0.0755306	2.99868
30	E	unclassified	Con	NA	630.3	0.98	NA	62.13	NA	NA	NA	NA	NA	NA	NA	NA	NA	NA	NA	NA
30	F	unclassified	Con	ADa1	756.65	1	NA	0	2.28898	11.2117	NA	NA	NA	8.13	19.4734	73.9991	6.5275	505.337	0.110732	2.34351
31	A	Ig2	SLo	Abp	171.18	0.83	1.8e-05	145.15	1.001	8.9321	6.39	7.99396	100	7.31	14.2637	67.4634	18.2729	363.447	0.0701782	3.63084
31	B	Ig2	SLo	NA	479.66	0.95	NA	123.8	NA	NA	NA	NA	NA	NA	NA	NA	NA	NA	NA	NA
31	C	Ig2	SLo	Abp	NA	NA	NA	NA	1.12661	8.89854	6.34	8.831	100	7.18	15.3737	75.2917	9.33459	452.793	0.0732818	4.01907
31	D	Ig2	SLo	Abp	116.69	0.88	0.00013	272.98	1.06261	8.96492	NA	NA	NA	7.1	14.9395	72.7316	12.329	432.236	0.0711274	4.0677
31	E	Ig2	SLo	NA	173.8	0.75	-0.00012	335.5	NA	NA	NA	NA	NA	NA	NA	NA	NA	NA	NA	NA
31	F	Ig2	SLo	AbB	135.41	0.86	-0.00041	376.98	1.0269	8.62161	NA	NA	NA	7.34	20.8559	64.8849	14.2592	394.39	0.049238	3.84058
32	A	unclassified	Con	Gbbk4	207.49	0.95	3.3e-05	228.91	1.35324	8.69376	5.96	8.6004	96.4641	6.72	17.7546	64.2188	18.0266	481.653	0.0762192	3.55925
32	B	unclassified	Con	NA	271.97	0.98	-1.4e-05	22.02	NA	NA	NA	NA	NA	NA	NA	NA	NA	NA	NA	NA
32	C	unclassified	Con	Gbax4	207.47	0.94	-0.00012	151.71	1.53351	9.04858	NA	NA	NA	6.86	24.9157	62.8642	12.2202	551.607	0.0615481	3.59702
32	D	unclassified	Con	Gbax4	115.32	0.81	-0.00039	72.8	1.06635	9.60421	NA	NA	NA	6.79	15.3616	61.4464	23.1921	379.611	0.0694168	3.5599
32	E	unclassified	Con	NA	502.11	0.97	-1.6e-05	186.11	NA	NA	NA	NA	NA	NA	NA	NA	NA	NA	NA	NA
32	F	unclassified	Con	Gbbk4	1095.9	1	NA	NA	1.29428	9.27946	5.72	15.1248	79.6577	6.96	28.8291	60.615	10.5559	481.463	0.0448951	3.71992
33	A	CIN	SLo	Aba1	119.89	0.83	-0.00041	120.09	0.9922	9.27972	NA	NA	NA	6.85	14.4399	78.2794	7.28074	326.897	0.0687124	3.29467
33	B	CIN	SLo	NA	82.55	0.83	-0.00035	98.52	NA	NA	NA	NA	NA	NA	NA	NA	NA	NA	NA	NA
33	C	CIN	SLo	Aba1	130.35	0.86	-4.8e-06	152.99	1.05071	10.1348	5.64	9.63216	85.3364	6.66	14.1006	78.125	7.77439	316.05	0.0745153	3.00797
33	D	CIN	SLo	Aba1	125.24	0.94	-0.00033	207.85	1.00865	9.1333	5.75	9.01832	100	6.76	14.9242	77.6825	7.39323	364.35	0.0675849	3.61224
33	E	CIN	SLo	NA	63.05	0.9	-4.8e-06	54.83	NA	NA	NA	NA	NA	NA	NA	NA	NA	NA	NA	NA
33	F	CIN	SLo	Abp0_1	304.56	0.96	9.6e-06	116.22	1.00281	8.68266	NA	NA	NA	6.84	17.2225	75.9355	6.84202	374.634	0.0582271	3.73582
35	A	CIN	Lo	Aba(b)0	12.8	0.0074	-0.0065	16.86	1.03658	8.91038	6.2	9.40659	94.393	7.04	15.321	78.137	6.54206	336.727	0.0676576	3.24844
35	B	CIN	Lo	NA	15.05	0.014	-0.011	64.11	NA	NA	NA	NA	NA	NA	NA	NA	NA	NA	NA	NA
35	C	CIN	Lo	Aba(b)0	13.43	0.18	-0.0032	64.26	1.09861	9.09776	NA	NA	NA	7.73	14.1416	79.1163	6.74209	428.029	0.0776867	3.89609
35	D	CIN	Lo	Aba(b)0	14.09	0.24	-0.005	64.37	1.20164	9.09536	6.52	9.58671	100	7.38	14.816	78.7586	6.42545	485.924	0.0811042	4.04385
35	E	CIN	Lo	NA	26.8	0.31	-0.0023	87.2	NA	NA	NA	NA	NA	NA	NA	NA	NA	NA	NA	NA
35	F	CIN	Lo	Aba(b)0	14.69	0.073	-0.0029	65.68	1.14979	9.04669	NA	NA	NA	7.13	14.1706	76.4469	9.38246	441.546	0.081139	3.84023
36	A	CIN	Lo	Aca1	12.71	0.73	-0.0019	75.15	1.11334	8.6671	6.88	11.7535	100	7.74	19.811	75.8153	4.37367	417.672	0.0561979	3.75152
36	B	CIN	Lo	NA	7.05	0.58	-0.00053	251.88	NA	NA	NA	NA	NA	NA	NA	NA	NA	NA	NA	NA
36	C	CIN	Lo	Adp( c )	7.74	0.21	-0.0092	146.57	0.813349	7.85502	6.73	12.0226	100	7.67	21.5418	75.3962	3.06201	309.512	0.0377568	3.8054
36	D	CIN	Lo	ADa1	31.79	0.53	-0.00036	76.63	0.963274	8.35362	7.43	12.4436	100	8.12	19.9819	76.1574	3.86065	412.776	0.0482073	4.28513
36	E	CIN	Lo	NA	0.95	0.21	-0.0038	321.23	NA	NA	NA	NA	NA	NA	NA	NA	NA	NA	NA	NA
36	F	CIN	Lo	ADp0_1	9.43	0.05	-0.0069	44.63	1.18242	8.03563	7.68	10.1662	100	8.1	16.055	78.7462	5.19878	407.61	0.069192	3.66926
38	A	unclassified	Con	sAba2_3	8.81	0.8	-0.0006	433.42	1.74758	9.64494	NA	NA	NA	7.9	20.2745	73.3001	6.42545	529.848	0.0836706	3.1234
38	B	unclassified	Con	NA	755.75	0.99	NA	0	NA	NA	NA	NA	NA	NA	NA	NA	NA	NA	NA	NA
38	C	unclassified	Con	sAba2_3	24.21	0.84	-0.0003	461.93	1.66225	10.2662	NA	NA	NA	7.97	23.6481	64.6382	11.7137	470.43	0.0702909	2.83008
38	D	unclassified	Con	Aba1	35.99	0.94	-0.00015	662.3	1.44218	9.41543	7.34	13.845	100	7.96	21.1832	74.7188	4.09798	466.112	0.0656636	3.351
38	E	unclassified	Con	NA	50.56	0.91	-0.00026	32.82	NA	NA	NA	NA	NA	NA	NA	NA	NA	NA	NA	NA
38	F	unclassified	Con	Aba1	6.4	0.59	-0.0014	307	1.68741	10.5698	7.09	16.9201	93.0322	7.79	22.4632	72.0372	5.49961	528.084	0.075119	3.12954
39	A	Ig1	Lo	Aba(b)1	7.63	0.018	-0.0069	53.73	1.47243	10.2924	6.26	13.2498	85.4184	7.2	16.4422	77.1218	6.43595	448.302	0.0895517	3.04465
39	B	Ig1	Lo	NA	9.06	0.32	-0.0031	149.29	NA	NA	NA	NA	NA	NA	NA	NA	NA	NA	NA	NA
39	C	Ig1	Lo	Aba(b)0	NA	NA	NA	NA	1.73796	10.2512	NA	NA	NA	7.15	18.0364	74.8902	7.0734	515.924	0.0963583	2.96857
39	D	Ig1	Lo	Abp( c )	22.13	0.93	NA	10.77	1.91858	10.8896	NA	NA	NA	7.23	20.022	72.2362	7.74183	565.389	0.0958234	2.94692
39	E	Ig1	Lo	NA	23.98	0.32	-0.00097	230.37	NA	NA	NA	NA	NA	NA	NA	NA	NA	NA	NA	NA
39	F	Ig1	Lo	Aba(b)1	41.61	0.24	-0.001	496.49	1.227	9.78609	6.14	16.1845	85.2704	7.11	20.1145	74.6557	5.22977	417.672	0.0610009	3.404
40	A	Ig2	Con	GbBK2	122.83	0.91	1.2e-05	131.56	2.14175	11.3524	NA	NA	NA	7.38	23.9441	70.2622	5.79369	559.534	0.089448	2.61251
40	B	Ig2	Con	NA	1006.04	1	NA	NA	NA	NA	NA	NA	NA	NA	NA	NA	NA	NA	NA	NA
40	C	Ig2	Con	A-Gbp1	1002.82	1	NA	NA	1.65659	9.54154	NA	NA	NA	7.22	23.1445	72.5718	4.2837	483.11	0.071576	2.91629
40	D	Ig2	Con	A-Gbp1	73.82	0.96	-0.00014	349.71	1.65731	9.33596	5.36	10.6226	89.8932	6.44	18.2538	75.734	6.01212	368.218	0.0907921	2.22179
40	E	Ig2	Con	NA	1036.12	1	NA	NA	NA	NA	NA	NA	NA	NA	NA	NA	NA	NA	NA	NA
40	F	Ig2	Con	A-Gbp1	633.41	0.98	NA	30.94	3.31299	15.3568	7.29	15.9091	100	7.79	20.648	52.8113	26.5407	550.148	0.149064	1.78743
8	G	GEM	Fag	Aba0	NA	NA	NA	NA	1.98269	9.41231	NA	NA	NA	7.16	21.967	69.7549	8.27809	682.675	0.0902576	3.44318
30	G	unclassified	Con	NA	NA	NA	NA	NA	NA	NA	NA	NA	NA	NA	NA	NA	NA	NA	NA	NA
