# Supplementary material for: Digging deeper: assessing soil quality in a diversity of conservation agriculture practices
Source: Copernicus journal article supplement (doi:10.5194/soil-12-79-2026), 2026-01-27
Supplement: Supplementary file [file soil-12-79-2026-supplement-title-page.pdf › soil-12-79-2026-supplement-title-page.pdf]

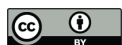

*Supplement of*

**Digging deeper: assessing soil quality in a diversity of conservation agriculture practices**

**Manon S. Ferdinand et al.**

*Correspondence to:* Manon S. Ferdinand ([manon.ferdinand@uclouvain.be](mailto:manon.ferdinand@uclouvain.be))

- [soil-12-79-2026-supplement-title-page.pdf](#)
- [Supplement\\_S3\\_Table\\_S3.xlsx](#)
- [supplementary\\_data\\_140126.pdf](#)

The copyright of individual parts of the supplement might differ from the article licence.
